# Supplementary material for: IL-6 secreted by cancer-associated fibroblasts promotes epithelial-mesenchymal transition and metastasis of gastric cancer via JAK2/STAT3 signaling pathway
Source: PubMed Central journal article supplement (PMC5400541; doi:10.18632/oncotarget.15119), 2017-02-06
Supplement: oncotarget-08-20741-s001.pdf [file oncotarget-08-20741-s001.pdf]

# IL-6 secreted by cancer-associated fibroblasts promotes epithelial-mesenchymal transition and metastasis of gastric cancer via JAK2/STAT3 signaling pathway

## Supplementary Materials

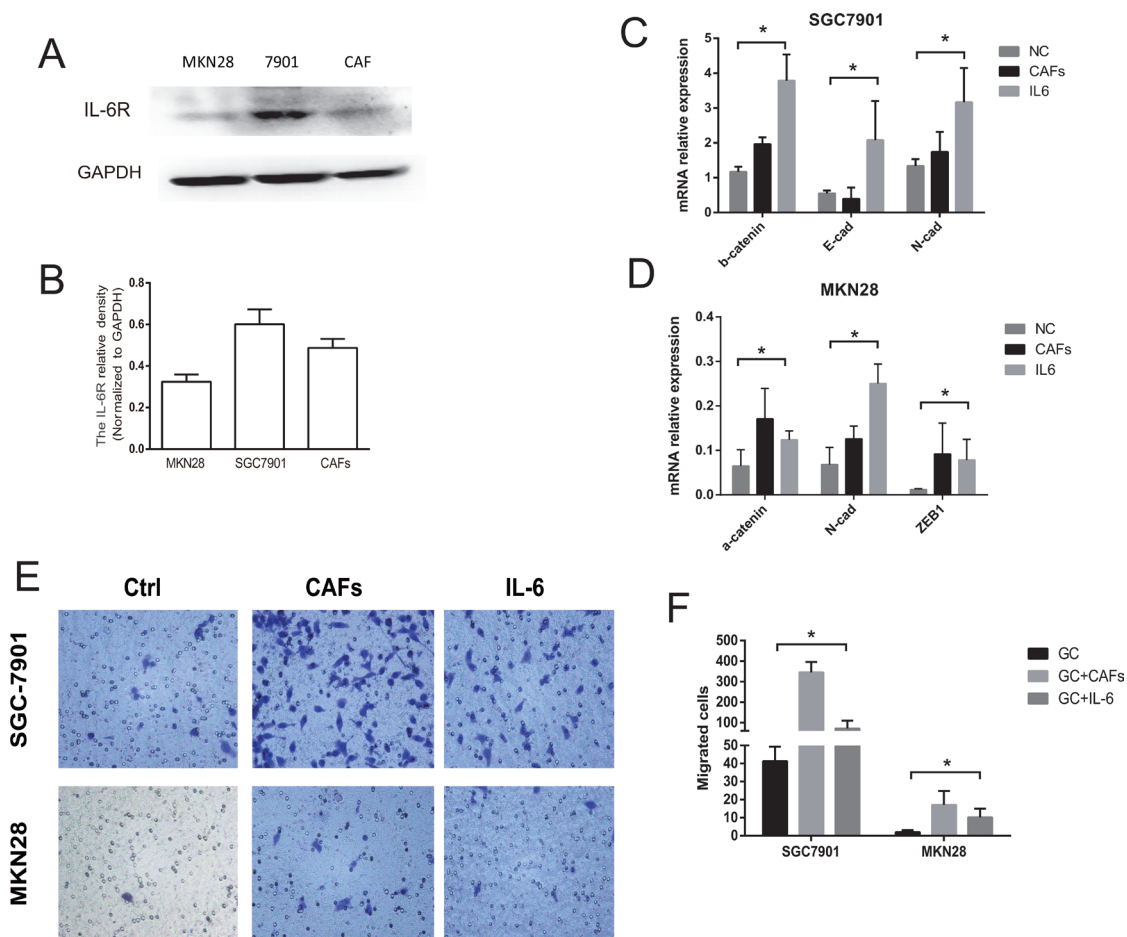

**Supplement Figure 1: Exogenous IL-6 promotes EMT and migration of gastric cancer cells.** (A) Protein levels of IL-6 receptor (IL-6R) in SGC-7901, MKN28 and CAFs were analyzed by western blot. Representative results from one of the three independent experiments are presented. (B) Densitometric analysis of IL-6R expression is shown. (C, D) The expression of EMT makers in SGC-7901 and MKN28 treated with recombinant IL-6 or co-culture with CAFs were detected by qRT-PCR. (E) The effect of CAFs or IL-6 on cell migration was determined after 24 hrs. Representative photographs of migratory cells on the membrane (magnification, 100×) are shown. (F) Migratory Cells were counted in ten randomly selected microscopic fields. Values are represented as mean ± SD of three independent experiments. \**P* < 0.05.
